# Supplementary material
Source: MDPI journal article supplement (https://www.mdpi.com/2073-4441/11/3/429)
Supplement: s1 [file s1]

| Contaminant             |                                                                             | Fe <sup>0</sup>     |                                              | Scale                       | Duration              | Fe <sup>0</sup> filter dimensions                              | Capacity    | Remarks                                                                                                   | Ref.  |
|-------------------------|-----------------------------------------------------------------------------|---------------------|----------------------------------------------|-----------------------------|-----------------------|----------------------------------------------------------------|-------------|-----------------------------------------------------------------------------------------------------------|-------|
| X                       | [X]                                                                         | Nature              | Amount                                       |                             |                       |                                                                |             |                                                                                                           |       |
| As                      | 0.5-10 mg/L                                                                 | Carbon steel-wool   | n.a                                          | Laboratory                  | 15 min                | n.a                                                            | n.a         | As removal attributed to electrochemical reactions                                                        | [105] |
| Chromate                | 0.5-.0 mg/L K <sub>2</sub> CrO <sub>4</sub>                                 | Powder carbon steel | 1 g agitated with 50 ml of chromate solution | Laboratory batch experiment | 15 min                | batch                                                          | n.a         | 100% Cr(VI) removal observed at 0.5 - and 1.0 mg/L, and process is irreversible                           | [106] |
| <i>E. coli</i>          | 8.5 log CFU/100 ml                                                          | granular            | 1: 1 (23 kg Fe <sup>0</sup> : 23 kg sand)    | Field columns and plots     | 0-15 days             | Column: length: 0.77 m, diameter: 0.14<br>Plots: 0.9 m x 1.8 m | -           | Fe <sup>0</sup> filters significantly reduced <i>E. coli</i> relative to control (sand)                   | [15]  |
| As (III)                | 500 µg/L                                                                    | Iron fillings       | 1: 2-3 (1.5 g Fe <sup>0</sup> : 3-4 g sand ) | Laboratory column filter    | Contact time: 5.3 s   | Column: length 3-4 cm, diameter: 10 mm                         | 1 L/hr      | Removal attributed to As (III) oxidation to As(V), and its subsequent adsorption on hydrous ferric oxides | [107] |
| Viruses, bacteriophages | 0.98 x 10 <sup>6</sup> -7.9 x 10 <sup>6</sup> plaque forming units (PFU)/ml | granular            | 1: 1 Fe <sup>0</sup> : sand                  | Laboratory column filter    | Contact time: 9.3 min | Column: length: 10 cm, diameter: 3.8                           | 0.73 ml/min | Fe <sup>0</sup> removed 4.5 to 6 logs of viruses while sand showed no removal                             | [108] |

|                               |                                                                                                  |                          |     |                             |                      |                                       |             |                                                                                |       |
|-------------------------------|--------------------------------------------------------------------------------------------------|--------------------------|-----|-----------------------------|----------------------|---------------------------------------|-------------|--------------------------------------------------------------------------------|-------|
| Viruses                       | 10 <sup>5</sup> PFU/mL                                                                           | granular                 |     | Laboratory batch experiment | Contact time: 20 min | batch                                 | n.a         | 4-5 log removal via inactivation and biocidal effects of Fe                    | [109] |
| Inorganic, organic & bacteria | 2 & 5 mg/L (Cu, Zn, Ni & Fe), 15,035 CFU/100 ml total coliforms & 1850 CFU/100 ml <i>E. coli</i> | Iron oxide coated gravel | n.a | Laboratory column           | 64 days              | Column: length: 55 cm, diameter: 3.81 | 0.015 L/min | 92.2 to 99.3% of metals, 99% <i>E. coli</i> and 95.3% total coliforms removed. | [208] |

**Table S1.** Summary of some experimental conditions used for experiments in selected peer-reviewed articles using Fe<sup>0</sup> materials for decentralized water treatment. X stands for the tested contaminant and [X] for its initial concentration. n.a data not available.
